# The prognostic value of over-expressed TrkB in solid tumors: a systematic review and meta-analysis

Chunze Zhang<sup>1,2,\*</sup>, Xiaoting Li<sup>1,\*</sup>, Dan Gao<sup>3,\*</sup>, Haihua Ruan<sup>4,\*</sup>, Zhenzhen Lin<sup>1</sup>, Xiaobo Li<sup>1</sup>, Guang Liu<sup>2</sup>, Zhicheng Ma<sup>5</sup> and Xichuan Li<sup>1</sup>

<sup>1</sup>Department of Immunology, Tianjin Medical University, Tianjin, China

<sup>2</sup>Tianjin Union Medical Center, Tianjin, China

<sup>3</sup>Department of Chemistry and Chemical Biology, University of New Mexico, Albuquerque, New Mexico, United States

<sup>4</sup>Tianjin Key Laboratory of Food Science and Biotechnology, College of Biotechnology and Food Science, Tianjin University of Commerce, Tianjin, China

<sup>5</sup>Department of Gastrointestinal Surgery, Tianjin First Center Hospital, Tianjin, China

\*These authors contributed equally to this work

**Correspondence to:** Xichuan Li, **email:** xichuanli@tmu.edu.cn

**Keywords:** *solid tumors, anoikis, TrkB, prognosis, meta-analysis*

**Received:** April 25, 2017

**Accepted:** July 11, 2017

**Published:** July 25, 2017

**Copyright:** Zhang et al. This is an open-access article distributed under the terms of the Creative Commons Attribution License 3.0 (CC BY 3.0), which permits unrestricted use, distribution, and reproduction in any medium, provided the original author and source are credited.

## ABSTRACT

**It is reported recently Tropomyosin-related receptor Kinase B (TrkB) plays key roles in the anoikis resistance during the processes of tumorigenesis and metastasis. However, its prognostic significance for clinical patients remains inconclusive. In order to establish a correct and practicable link between increased TrkB and prognostication of human solid tumors, a meta-analysis was performed in this article. A systematic literature research in the electronic databases PubMed, Embase and Web of Science was performed to identify eligible studies. A fixed-effects meta-analytical model was employed to correlate TrkB expression with OS, DFS and clinicopathological features. A total of 11 studies covering 1516 patients with various solid tumors were recruited in this meta-analysis. TrkB over-expression was associated with poorer OS and poorer DFS in multivariate analysis. Additionally, the pooled odds ratios (ORs) indicated that TrkB over-expression was associated with large tumor size, lymph node metastasis, distant metastasis and a higher clinical stage. Overall, these results indicated that TrkB over-expression in patients with solid tumors might be related to poor prognosis and serve as a potential predictive marker of poor clinicopathological prognosis factor.**

## INTRODUCTION

Anoikis is a form of programmed cell death that occurs in anchorage-dependent cells when they detach from the surrounding extracellular matrix [1–3]. Anoikis acts as an important defense for the organism by preventing detached cells' re-adhesion to new matrices in incorrect locations and their dysplastic growth [4]. Failure to execute the anoikis program and resistance to anoikis evolve as a hallmark of metastatic cancers which enables cancer cells to disseminate to distant organs through systemic circulation [5–7].

Tropomyosin-related receptor Kinase B (TrkB) is a tyrosine kinase receptor for brain-derived neurotrophic factor (BDNF), which triggers several intracellular

signals [8–10]. TrkB was originally defined as a specific suppressor of caspase-associated anoikis of non-malignant epithelial cells. High expression of TrkB promoted tumorigenesis and metastasis. The vast bulk of the evidence from studies on solid tumor cells of liver, lung, breast and ovary indicated that anoikis suppression induced by over-expressed TrkB best owed enhanced metastatic capacity on various tumor cells [11–14]. Therefore, TrkB is expected to be a potential drug target [15, 16]. the correlation between the expression of TrkB and patient survival remains inconclusive. Therefore, it is necessary to analyze the data of TrkB systematically in human solid tumors to draw a reasonable conclusion about its prognostic significance.

In this study, we conducted a meta-analysis to investigate the significance of over-expressed TrkB in the prediction of prognosis of corresponding patients. The results showed that increased TrkB expression in patients with solid tumors related to poor prognosis and served as a potential prediction of poor clinicopathological prognosis factor.

## RESULTS

### Study search information

The initial search identified 315 publications, of which, 18 studies were of acceptable relevance. However, four of these studies were excluded because the survival curve was based on NTRK2 expression, and three were excluded because of the absence of information about clinicopathological characteristics. Ultimately, 11 studies met the eligibility criteria and were included in the current meta-analysis (Figure 1).

### Description of the studies

The characteristics of the 11 identified studies were shown in Table 1. In total, 1516 patients from three regions (China, Greece and Japan) with 8 distinct cancers (gastric cancers [17–19], colorectal cancers [20, 21], nasopharyngeal carcinoma [22], non-small cell lung cancers [23], ovarian cancers [24], oral squamous cell carcinoma [25], hepatocellular carcinoma [26], sinonasal

squamous cell carcinoma [27]) were included in these studies.

### Correlations of TrkB expression and OS

The pooled hazard ratio (HR) revealed that over-expressed TrkB was significantly associated with poor overall survival (OS) for cancer victims in multivariate analysis (HR: 1.76, 95% CI: 1.48–2.10; Figure 2). However, no significant heterogeneity ( $I^2 = 31.6%$ ,  $P = 0.147$ ) was observed when using a fixed-effects model to analyze the pooled HR of the OSs.

### Correlations of TrkB expression and DFS

A significant correlation between over-expressed TrkB and disease-free survival (DFS) was also observed in the patients with solid tumors in multivariate analysis (HR: 2.20, 95% CI: 1.63–2.96; Figure 3) in the fixed-effects model without significant heterogeneity ( $I^2 = 0.0%$ ,  $P = 0.419$ ).

### Correlations of TrkB expression and clinicopathological parameters

The clinical and pathological parameters collected from the eligible studies were presented in Table 2. Meanwhile, pooled results of the correlations were identified between over-expressed TrkB and clinicopathological features of patients with solid tumors.

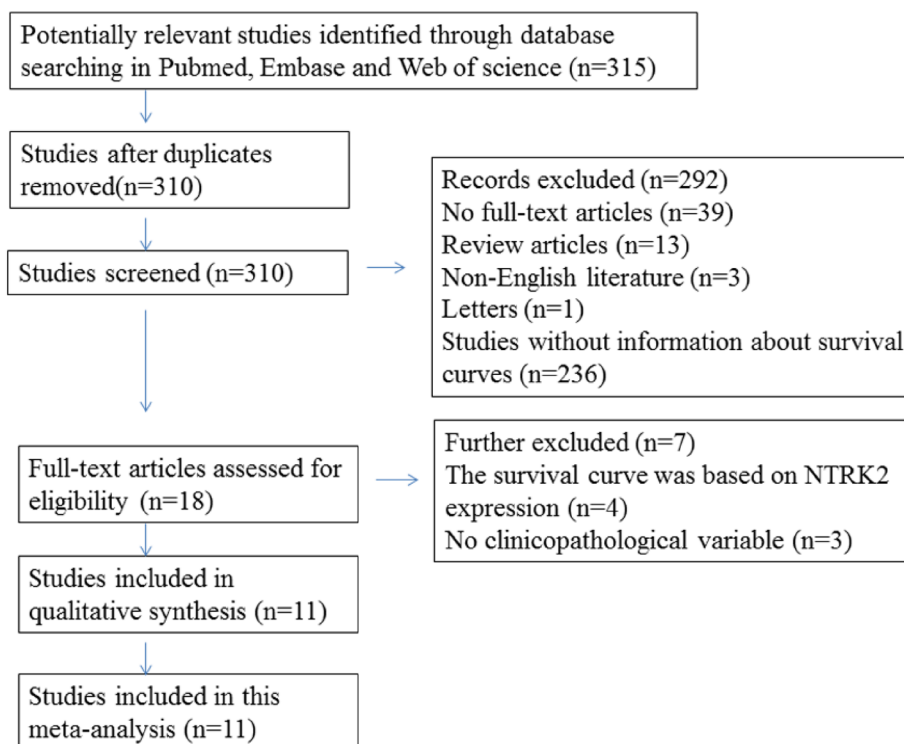

Figure 1: Flow diagram of the selection of eligible studies.

**Table 1: Main characteristics of studies exploring the relationship between TrkB expression and tumor prognosis**

| Author          | Year | Region | Cancer Type | Stage / Grade | No. of Patients | Age Median (Range) | Follow-up Time Median (range) | Detection Method | Staining position          | Cut-off      | Outcomes | NOS Score |
|-----------------|------|--------|-------------|---------------|-----------------|--------------------|-------------------------------|------------------|----------------------------|--------------|----------|-----------|
| Tanaka K [16]   | 2014 | Japan  | GC          | pT1-pT4       | 320             | 68 y (18-90)       | 25.9 m (1.4-124.5)            | IHC              | Both nucleus and cytoplasm | > 10%        | OS       | 8         |
| Fan M [19]      | 2014 | China  | CRC         | I-IV          | 191             | NR                 | NR                            | IHC              | No specific description    | > 10%        | OS       | 8         |
| Li SS [21]      | 2013 | China  | NPC         | I-IV          | 108             | 56 y (19-86)       | 60 m                          | IHC              | Cytoplasm                  | > 10%        | DFS, OS  | 7         |
| Okugawa Y [17]  | 2013 | Japan  | GC          | I-IV          | 150             | NR                 | NR                            | IHC              | Both nucleus and cytoplasm | > 10%        | OS       | 8         |
| Okamura K [22]  | 2012 | Japan  | NSCLC       | I-IV          | 102             | 66.3 ± 10.19 y     | 1470 d                        | IHC              | Membrane and cytoplasm     | > 10%        | DFS, OS  | 7         |
| Sasahira T [24] | 2013 | Japan  | OSCC        | I-IV          | 102             | 68.7 y (48-79)     | NR                            | IHC              | Cytoplasm                  | > 10%        | DFS      | 7         |
| Au CW [23]      | 2009 | China  | OC          | I-IV          | 94              | 20-83              | NR                            | IHC              | Membrane and cytoplasm     | > 10%        | DFS, OS  | 6         |
| Zhang Y [18]    | 2008 | Japan  | GC          | pT1-pT4       | 161             | 63 y (34-100)      | NR                            | IHC              | Cytoplasm                  | > 10%        | DFS, OS  | 7         |
| Dawson H [20]   | 2015 | Greece | CRC         | pT1-pT4       | 211             | 70.5 y (35-93)     | NR                            | IHC              | Membrane and cytoplasm     | Membrane (+) | OS       | 8         |
| Lam CT [25]     | 2011 | China  | HCC         | I-IV          | 50              | 55 y (30-82)       | NR                            | IHC              | Membrane and cytoplasm     | > 10%        | OS       | 6         |
| Li L [26]       | 2016 | China  | SSCC        | I-IV          | 27              | 55 y (34-74)       | NR                            | IHC              | Membrane and cytoplasm     | > 10%        | DFS, OS  | 5         |

GC: Gastric Cancers; CRC: Colorectal Cancers; NPC: Nasopharyngeal Carcinoma; NSCLC: Non-Small Cell Lung Cancers; OC: Ovarian Cancers; OSCC: Oral Squamous Cell Carcinoma; HCC: Hepatocellular Carcinoma; SSCC: Sinonasal Squamous Cell Carcinoma; NR: Not Reported; OS: Overall Survival; DFS: Disease-Free Survival.

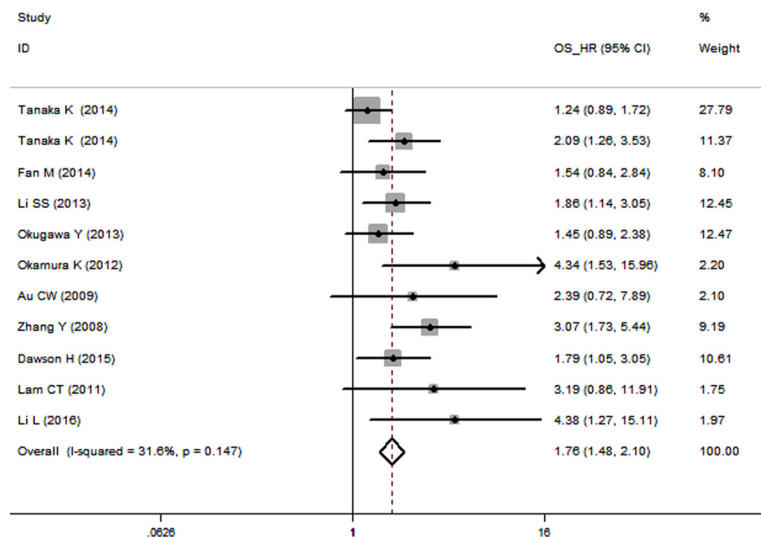

**Figure 2: Forest plot describing the association between over-expressed TrkB and OS.**

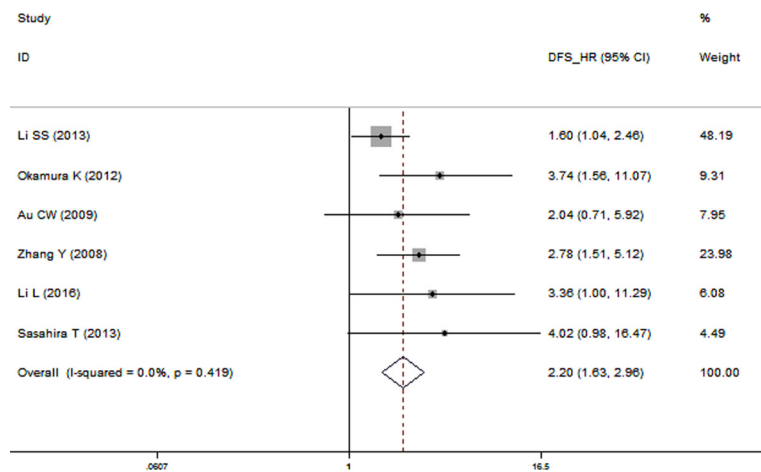

**Figure 3: Forest plot describing the association between over-expressed TrkB and DFS.**

**Table 2: Summarized data of clinical and pathological parameters from the eligible studies**

| First author    | Gender |     |        |    | Tumor differentiation          |     |                     |     | Tumor size |     |      |     | Lymph node metastasis |     |    |     | Distant metastasis |    |    |     | Clinical stage |    |      |     |
|-----------------|--------|-----|--------|----|--------------------------------|-----|---------------------|-----|------------|-----|------|-----|-----------------------|-----|----|-----|--------------------|----|----|-----|----------------|----|------|-----|
|                 | Male   |     | Female |    | Poor+Moderate/undifferentiated |     | Well/differentiated |     | T3-4       |     | T1-2 |     | Yes                   |     | No |     | Yes                |    | No |     | III-IV         |    | I-II |     |
|                 | TrkB+  | -   | +      | -  | +                              | -   | +                   | -   | +          | -   | +    | -   | +                     | -   | +  | -   | +                  | -  | +  | -   | +              | -  | -    |     |
| Tanaka K [16]   | 50     | 181 | 17     | 72 | 24                             | 143 | 43                  | 110 | 47         | 129 | 20   | 124 | 43                    | 119 | 24 | 134 | 6                  | 11 | 61 | 242 | 37             | 94 | 30   | 159 |
| Fan M [19]      | 49     | 52  | 56     | 34 | 66                             | 57  | 39                  | 29  | NA         | NA  | NA   | NA  | 52                    | 21  | 53 | 65  | 18                 | 6  | 87 | 80  | 40             | 32 | 65   | 54  |
| Li SS [21]      | 31     | 56  | 12     | 9  | 39                             | 61  | 4                   | 4   | 24         | 21  | 19   | 44  | 38                    | 43  | 5  | 22  | 7                  | 5  | 36 | 60  | 42             | 52 | 1    | 13  |
| Okugawa Y [17]  | 54     | 65  | 10     | 21 | 25                             | 50  | 39                  | 36  | 46         | 52  | 18   | 34  | 50                    | 55  | 14 | 31  | 6                  | 6  | 58 | 80  | 47             | 55 | 17   | 31  |
| Okamura K [22]  | 54     | 18  | 23     | 7  | 56                             | 15  | 13                  | 9   | 9          | 4   | 68   | 21  | 26                    | 6   | 51 | 19  | NA                 | NA | NA | NA  | 16             | 4  | 61   | 21  |
| Sasahira T [24] | 21     | 47  | 11     | 23 | 11                             | 27  | 21                  | 43  | 19         | 32  | 13   | 38  | 17                    | 30  | 15 | 40  | NA                 | NA | NA | NA  | 23             | 42 | 9    | 28  |
| Zhang Y [18]    | 43     | 67  | 21     | 30 | 20                             | 51  | 44                  | 46  | 27         | 22  | 37   | 75  | 27                    | 34  | 37 | 63  | 14                 | 3  | 50 | 94  | NA             | NA | NA   | NA  |
| Dawson H [20]   | 27     | 41  | 26     | 46 | 48                             | 74  | 4                   | 13  | 44         | 71  | 8    | 16  | 31                    | 48  | 21 | 39  | 11                 | 8  | 42 | 78  | NA             | NA | NA   | NA  |
| Li L [26]       | 13     | 7   | 5      | 2  | 15                             | 3   | 3                   | 6   | 14         | 4   | 4    | 5   | 6                     | 1   | 12 | 8   | NA                 | NA | NA | NA  | 16             | 4  | 2    | 5   |

**Table 3: Meta-analysis results of the associations of increased TrkB expression with clinicopathological parameters**

| Clinicopathological parameter     | Ref                        | Overall OR (95% CI) | P-value | Heterogeneity test (Q, I <sup>2</sup> , P-value) |
|-----------------------------------|----------------------------|---------------------|---------|--------------------------------------------------|
| Gender (male vs female)           | [16–22, 24, 26]            | 0.907 (0.703–1.169) | 0.451   | 8.52, 6.1%, 0.384                                |
| Differentiation (poor VS well)    | [16–22, 24, 26]            | 0.867 (0.524–1.435) | 0.451   | 25.11, 68.1%, 0.3677                             |
| Tumor size (T3–4 vs T1–2)         | [16–18, 20–22, 24, 26]     | 1.960 (1.473–2.608) | 0.000   | 5.83, 0.0%, 0.559                                |
| Lymph node metastasis (yes vs no) | [16–22, 24, 26]            | 1.927 (1.499–2.477) | 0.000   | 7.51, 0.0%, 0.483                                |
| Distant metastasis (yes vs no)    | [16–21]                    | 2.755 (1.781–4.260) | 0.000   | 4.70, 0.0%, 0.453                                |
| Clinical stage (III-IV vs I-II)   | [16–17, 19, 21–22, 24, 26] | 1.775 (1.159–2.716) | 0.008   | 9.52, 37.0%, 0.146                               |

No significant correlation of over-expressed TrkB with gender and tumor differentiation were observed. However, the expression of TrkB was positively associated with large tumor size (OR: 1.96, 95% CI: 1.47–2.61), lymph node metastasis (OR: 1.93, 95% CI: 1.50–2.48), distant metastasis (OR: 2.76, 95% CI: 1.78–4.26) and a higher clinical stage (OR: 1.78, 95% CI: 1.16–2.72) in the fixed-effects model without significant heterogeneities (see Table 3).

**Publication bias**

We constructed funnel plots and performed Begg’s test to assess publication bias. As a result, the shape of the funnel plot for the OS, DFS and clinicopathological parameters seemed symmetrical in the multivariate analysis method (Figure 4, Figure 5 and Supplementary Figure 1).

**DISCUSSION**

TrkB is a tyrosine kinase receptor for brain-derived neurotrophic factor (BDNF), which triggers several intracellular signals. TrkB is over-expressed in various

human malignancies and growing evidence demonstrated its association with tumour cell proliferation, invasion and metastasis [28–31]. TrkB is also an anoikis resistance related gene, whose over-expression may enhance a resistance of detachment-induced apoptosis. Consequently, knockdown of TrkB provided inhibition of growth or invasion and decrease of apoptosis in oral squamous cell carcinoma (OSCC) and endometrial carcinoma cells [25, 32]. However, thus far, no meta-analyses have been performed to evaluate the prognostic value of TrkB in cancer victims. This meta-analysis systematically estimates the association between TrkB expression and prognostic value of solid tumors.

In this meta-analysis, we evaluated survival data from 1516 solid tumor patients from 11 eligible studies, which met the inclusion criteria, were organized according to OS and DFS. For all studies, TrkB expression was detected by IHC. By meta-analysis of the 11 studies, we identified the pool HRs which indicated that TrkB was a factor in poor prognosis in various cancers. Because there is no significant heterogeneity among our included studies, so we did not perform further subgroup analyses.

Additionally, no publication bias was observed. These results indicated over-expressed TrkB was positive related to poor OS and DFS in solid tumor patients. In addition, pooled results of the correlations were identified between over-expressed TrkB and clinicopathological features of patients with solid tumors. The results showed the expression of TrkB was positively associated with large tumor size, lymph node metastasis, distant metastasis and a higher clinical stage. We can explain this result by TrkB's ability to enhance anoikis resistance, promote tumour cell proliferation, invasion and metastasis. Because of its involvement in these processes, TrkB is likely to be causally involved in tumor progression and, consequently, increased levels of TrkB would be expected to indicate a poor prognosis.

This meta-analysis was properly conducted, however, further analysis with several limitations would

be considered in the future. first, need more trials to analysis; second, some of the survival data were extracted from Kaplan-Meier curves and might be less reliable than a direct analysis of variance; third, we need to search more non-English publications. In addition, the possible existence of unpublished studies could also result in potential publication bias. In general, concerning these limitations mentioned above, we must interpret these results with adequate caution.

In conclusion, our meta-analysis indicated that over-expressed TrkB was positive related to poor OS and DFS in solid tumor patients. Over-expressed TrkB could be served as a potential marker for poor clinicopathological prognostic factors in patients with various solid tumors. However, additional studies related to specific tumor types are necessary to illuminate the clinical utility of increased TrkB in solid tumors.

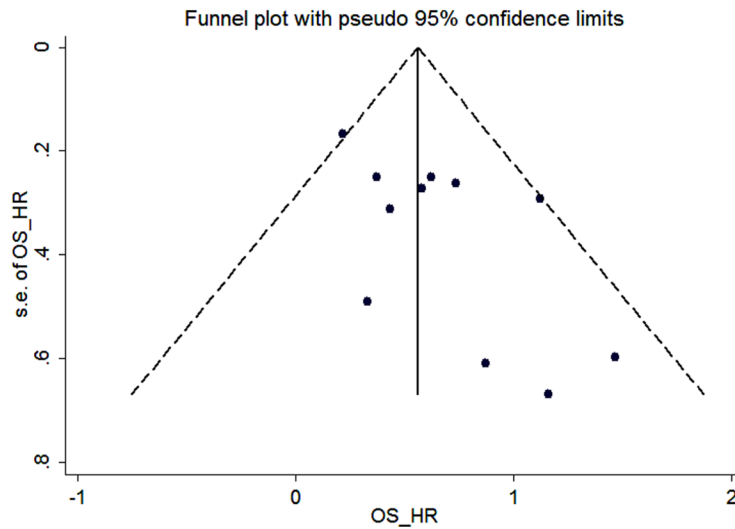

Figure 4: Funnel plot for the assessment of potential publication bias regarding OS in the meta-analysis.

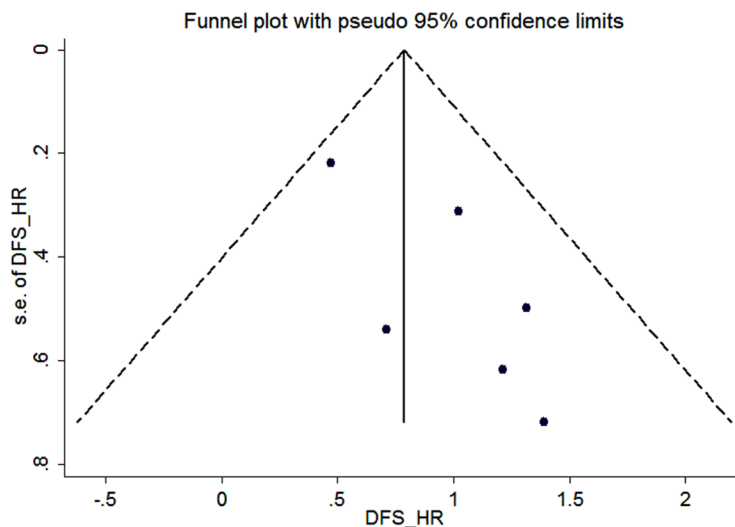

Figure 5: Funnel plot for the assessment of potential publication bias regarding DFS in the meta-analysis.

## MATERIALS AND METHODS

### Literature search strategy

This systematic review and meta-analysis is reported in accordance with the Preferred Reporting Items for Systematic Review and Meta-Analysis (PRISMA) Statement. The literatures relevant to TrkB expression and survival in solid tumors were searched in the PubMed, Embase and Web of Science databases through March 31, 2017. The search terms included the following key words in various combinations: TrkB, NTRK2, prognosis, prognostic, survival, and overall survival. The hits were limited to human studies and those published in English. The references list of review and bibliographies were further sifted to identify additional potentially relevant studies to avoid omission due to the electronic search approach.

### Study inclusion and exclusion criteria

The collected studies included in this meta-analysis had to meet the following criteria: (1) a pathological diagnosis of cancer was made; (2) TrkB expression in patients with any type of tumor was measured via immunohistochemistry; (3) associations of TrkB expression with OS, DFS or clinicopathological features were described; (4) HRs and 95% confidence intervals (CIs) were reported or could be calculated (based on the information in the paper); and (5) when the same author reported repeated results from the same population, the most complete report was included. The exclusion criteria for this meta-analysis were as follows: (1) unpublished papers; (2) laboratory articles, reviews and letters; (3) non-English language articles; (4) overlapping articles or ones with duplicate data; (5) articles with only animal experiments; (6) studies without information about survival curves; and (7) TrkB expression in patients with any type of tumor was analyzed only using RT-PCR method.

### Data extraction and quality assessment

All data were extracted independently by two investigators (Chunze Zhang and Dan Gao). For each eligible study, the following characteristics were extracted: first author's name, publication year, region, type of cancer, number of patients, patients' ages, follow-up times, detection methods, staining position, cut-off values, survival data (including OS and DFS) and clinicopathological parameters, such as tumor differentiation, tumor size, lymph node metastasis and TNM stage. For studies that presented only Kaplan-Meier curves was used to extract the survival data. The Newcastle-Ottawa-Scale (NOS) was adopted to assess the study quality of each individual study. The NOS score ranged from 0 to 9, and studies with NOS score  $\geq 7$  were defined as high-quality studies.

### Statistical analysis

This meta-analysis was performed using Stata 12.0 (Stata Corporation, College Station, TX, USA) software. Pooled estimates of HRs and their 95% CIs were used to estimate the association between TrkB expression and patients' survival. The chisquared test (Cochrane's  $Q$  test) and I-squared statistical test were used to analyze the heterogeneity between studies. When the result of a  $Q$ -test ( $I^2 > 50\%$  or  $P < 0.05$ ) indicated heterogeneity, the random-effects model was used for the meta-analysis. Otherwise, a fixed-effects model was used. HR with its value over 1.0 indicated poor prognosis patients with increased TrkB expression. Funnel plots were used to graphically represent the publication bias. Begg's (rank correlation) test was adopted to confirm the publication bias.

### Authors' contributions

Xichuan Li conceived and carried out the analysis. Chunze Zhang and Dan Gao performed literature search, study selection and data extraction. Xiaoting Li, Haihua Ruan and Xiaobo Li conducted statistical analysis and quality assessment. Zhenzhen Lin, Guang Liu and Zhicheng Ma prepared tables and figures. Xichuan Li wrote the manuscript. All authors reviewed the manuscript.

### CONFLICTS OF INTEREST

The authors declare no potential conflicts of interest.

### FUNDING

This work was supported by the National Natural Science Foundation of China (grants 81472681 to X.L. and 31540066 to H.R.) and the Foundation of Tianjin Health Bureau (grant 2014KR14 to C.Z.).

### REFERENCES

1. Grossmann J. Molecular mechanisms of "detachment-induced apoptosis-Anoikis". *Apoptosis*. 2002; 7:247–260.
2. Gilmore AP. Anoikis. *Cell Death Differ*. 2005; 12:1473–1477.
3. Chiarugi P, Giannoni E. Anoikis: a necessary death program for anchorage-dependent cells. *Biochem Pharmacol*. 2008; 76:1352–1364.
4. Paoli P, Giannoni E, Chiarugi P. Anoikis molecular pathways and its role in cancer progression. *Biochim Biophys Acta*. 2013; 1833:3481–3498.
5. Taddei ML, Giannoni E, Fiaschi T, Chiarugi P. Anoikis: an emerging hallmark in health and diseases. *J Pathol*. 2012; 226:380–393.
6. Yadav A, Kumar B, Yu JG, Old M, Teknos TN, Kumar P. Tumor-Associated Endothelial Cells Promote Tumor

- Metastasis by Chaperoning Circulating Tumor Cells and Protecting Them from Anoikis. *PLoS One*. 2015; 10:e0141602.
7. Dey S, Sayers CM, Verginadis, II, Lehman SL, Cheng Y, Cerniglia GJ, Tuttle SW, Feldman MD, Zhang PJ, Fuchs SY, Diehl JA, Koumenis C. ATF4-dependent induction of heme oxygenase 1 prevents anoikis and promotes metastasis. *J Clin Invest*. 2015; 125:2592–2608.
  8. Lim Y, Wu LL, Chen S, Sun Y, Vijayaraj SL, Yang M, Bobrovskaya L, Keating D, Li XJ, Zhou XF. HAP1 Is Required for Endocytosis and Signalling of BDNF and Its Receptors in Neurons. *Mol Neurobiol*. 2017. <https://doi.org/10.1007/s12035-016-0379-0>
  9. Tejada GS, Diaz-Guerra M. Integral Characterization of Defective BDNF/TrkB Signalling in Neurological and Psychiatric Disorders Leads the Way to New Therapies. *Int J Mol Sci*. 2017; 18. <https://doi.org/10.3390/ijms18020268>.
  10. Kimura A, Namekata K, Guo X, Harada C, Harada T. Neuroprotection, Growth Factors and BDNF-TrkB Signalling in Retinal Degeneration. *Int J Mol Sci*. 2016; 17. <https://doi.org/10.3390/ijms17091584>
  11. Douma S, Van Laar T, Zevenhoven J, Meuwissen R, Van Garderen E, Peeper DS. Suppression of anoikis and induction of metastasis by the neurotrophic receptor TrkB. *Nature*. 2004; 430:1034–1039.
  12. Sinkevicius KW, Kriegl C, Bellaria KJ, Lee J, Lau AN, Leeman KT, Zhou P, Beede AM, Fillmore CM, Caswell D, Barrios J, Wong KK, Sholl LM, et al. Neurotrophin receptor TrkB promotes lung adenocarcinoma metastasis. *Proc Natl Acad Sci USA*. 2014; 111:10299–10304.
  13. Lagadec C, Meignan S, Adriaenssens E, Foveau B, Vanhecke E, Romon R, Toillon RA, Oxombre B, Hondermarck H, Le Bourhis X. TrkA overexpression enhances growth and metastasis of breast cancer cells. *Oncogene*. 2009; 28:1960–1970.
  14. Siu MK, Wong OG, Cheung AN. TrkB as a therapeutic target for ovarian cancer. *Expert Opin Ther Targets*. 2009; 13:1169–1178.
  15. Desmet CJ, Peeper DS. The neurotrophic receptor TrkB: a drug target in anti-cancer therapy? *Cell Mol Life Sci*. 2006; 63:755–759.
  16. Wang T, Yu D, Lamb ML. Trk kinase inhibitors as new treatments for cancer and pain. *Expert Opin Ther Pat*. 2009; 19:305–319.
  17. Tanaka K, Shimura T, Kitajima T, Kondo S, Ide S, Okugawa Y, Saigusa S, Toiyama Y, Inoue Y, Araki T, Uchida K, Mohri Y, Kusunoki M. Tropomyosin-related receptor kinase B at the invasive front and tumour cell dedifferentiation in gastric cancer. *Br J Cancer*. 2014; 110:2923–2934.
  18. Okugawa Y, Tanaka K, Inoue Y, Kawamura M, Kawamoto A, Hiro J, Saigusa S, Toiyama Y, Ohi M, Uchida K, Mohri Y, Kusunoki M. Brain-derived neurotrophic factor/tropomyosin-related kinase B pathway in gastric cancer. *Br J Cancer*. 2013; 108:121–130.
  19. Zhang Y, Fujiwara Y, Doki Y, Takiguchi S, Yasuda T, Miyata H, Yamazaki M, Ngan CY, Yamamoto H, Ma Q, Monden M. Overexpression of tyrosine kinase B protein as a predictor for distant metastases and prognosis in gastric carcinoma. *Oncology*. 2008; 75:17–26.
  20. Fan M, Sun J, Wang W, Fan J, Wang L, Zhang X, Yang A, Wang W, Zhang R, Li J. Tropomyosin-related kinase B promotes distant metastasis of colorectal cancer through protein kinase B-mediated anoikis suppression and correlates with poor prognosis. *Apoptosis*. 2014; 19:860–870.
  21. Dawson H, Grundmann S, Koelzer VH, Galvan JA, Kirsch R, Karamitopoulou E, Lugli A, Inderbitzin D, Zlobec I. Tyrosine kinase receptor B (TrkB) expression in colorectal cancers highlights anoikis resistance as a survival mechanism of tumour budding cells. *Histopathology*. 2015; 66:715–725.
  22. Li SS, Liu JJ, Wang S, Tang QL, Liu BB, Yang XM. Clinical significance of TrkB expression in nasopharyngeal carcinoma. *Oncol Rep*. 2014; 31:665–672.
  23. Okamura K, Harada T, Wang S, Ijichi K, Furuyama K, Koga T, Okamoto T, Takayama K, Yano T, Nakanishi Y. Expression of TrkB and BDNF is associated with poor prognosis in non-small cell lung cancer. *Lung Cancer*. 2012; 78:100–106.
  24. Au CW, Siu MK, Liao X, Wong ES, Ngan HY, Tam KF, Chan DC, Chan QK, Cheung AN. Tyrosine kinase B receptor and BDNF expression in ovarian cancers - Effect on cell migration, angiogenesis and clinical outcome. *Cancer Lett*. 2009; 281:151–161.
  25. Sasahira T, Ueda N, Yamamoto K, Bhawal UK, Kurihara M, Kirita T, Kuniyasu H. Trks are novel oncogenes involved in the induction of neovascularization, tumor progression, and nodal metastasis in oral squamous cell carcinoma. *Clin Exp Metastasis*. 2013; 30:165–176.
  26. Lam CT, Yang ZF, Lau CK, Tam KH, Fan ST, Poon RT. Brain-derived neurotrophic factor promotes tumorigenesis via induction of neovascularization: implication in hepatocellular carcinoma. *Clin Cancer Res*. 2011; 17:3123–3133.
  27. Li L, Zhu L. Expression and clinical significance of TrkB in sinonasal squamous cell carcinoma: a pilot study. *Int J Oral Maxillofac Surg*. 2017; 46:144–150.
  28. Thiele CJ, Li Z, McKee AE. On Trk--the TrkB signal transduction pathway is an increasingly important target in cancer biology. *Clin Cancer Res*. 2009; 15:5962–5967.
  29. Li C, Li C, Zhu X, Wang C, Liu Z, Li W, Lu C, Zhou X. The expression and putative role of brain-derived neurotrophic factor and its receptor in bovine sperm. *Theriogenology*. 2012; 77:636–643.
  30. Lee J, Jiffar T, Kupferman ME. A novel role for BDNF-TrkB in the regulation of chemotherapy resistance in head and neck squamous cell carcinoma. *PLoS One*. 2012; 7:e30246.
  31. Sasahira T, Ueda N, Kurihara M, Matsushima S, Ohmori H, Fujii K, Bhawal UK, Yamamoto K, Kirita T, Kuniyasu

- H. Tropomyosin receptor kinases B and C are tumor progressive and metastatic marker in colorectal carcinoma. *Hum Pathol.* 2013; 44:1098–1106.
32. Bao W, Qiu H, Yang T, Luo X, Zhang H, Wan X. Upregulation of TrkB promotes epithelial-mesenchymal transition and anoikis resistance in endometrial carcinoma. *PLoS One.* 2013; 8:e70616.
